# Supplementary material for: Boosting the performance of Ni/Al2O3 for the reverse water gas shift reaction through formation of CuNi nanoalloys
Source: Royal Society of Chemistry journal article supplement (doi:10.1039/d1cy01585k), 2021-11-06
Supplement: d1cy01585k1.pdf [file d1cy01585k1.pdf]

# **Boosting the performance of Ni/Al<sub>2</sub>O<sub>3</sub> for the Reverse Water Gas Shift reaction through formation of copper-nickel nanoalloys**

**Esteban Gioria <sup>a</sup>, Piyush Ingale <sup>a</sup>, Felix Pohl <sup>a</sup>, Raoul Naumann d'Alnoncourt <sup>a\*</sup>, Arne  
Thomas <sup>b</sup>, Frank Rosowski <sup>a,c</sup>**

*<sup>a</sup> BasCat – UniCat BASF JointLab, Technische Universität Berlin, Berlin 10623, Germany.*

*<sup>b</sup> Functional Materials, Department of Chemistry, Technische Universität Berlin, Berlin 10623,  
Germany*

*<sup>c</sup> BASF SE, Process Research and Chemical Engineering, Ludwigshafen 67056, Germany*

*\* [r.naumann@bascat.tu-berlin.de](mailto:r.naumann@bascat.tu-berlin.de)*

## Table of Contents

|                                                                                                                                                                                                                       |    |
|-----------------------------------------------------------------------------------------------------------------------------------------------------------------------------------------------------------------------|----|
| Figure S1. Thermogravimetric analysis of uncalcined samples. ....                                                                                                                                                     | 3  |
| Figure S2. Nitrates decomposition temperature of copper, nickel, and copper-nickel catalyst.....                                                                                                                      | 4  |
| Figure S3. TGA – MS Study of Cu <sub>50</sub> Ni <sub>50</sub> /Al <sub>2</sub> O <sub>3</sub> prepared via impregnation of nitrates.....                                                                             | 5  |
| Table S1. Elemental composition of the impregnated and calcined CuNi/Al <sub>2</sub> O <sub>3</sub> catalysts. n/d: below detection limit.....                                                                        | 6  |
| Table S2. Hydrogen consumption of the different catalysts after reduction pretreatment at 900°C and 500°C. ....                                                                                                       | 7  |
| Figure S4. a) Nitrogen sorption isotherms and b) pore size distribution of CuNi/Al <sub>2</sub> O <sub>3</sub> catalyst. .                                                                                            | 8  |
| Table S3. Comparison of the Cu/Ni atomic ratio determined by XPS and ICP analysis. ....                                                                                                                               | 9  |
| Figure S5. Catalytic performance of the CuNi/Al <sub>2</sub> O <sub>3</sub> catalysts during the 30h of time on stream: a) CO <sub>2</sub> conversion; b) CO selectivity; c) space-time yield of carbon monoxide..... | 10 |
| Figure S6. Hydrogen consumption of the different catalysts during time on stream. ....                                                                                                                                | 11 |
| Figure S7. STEM-EDS study of fresh Ni/Al <sub>2</sub> O <sub>3</sub> catalyst. ....                                                                                                                                   | 12 |
| Figure S8. STEM-EDS study of spent Ni/Al <sub>2</sub> O <sub>3</sub> catalyst (after reaction). ....                                                                                                                  | 13 |
| Figure S9. STEM-EDS study of fresh Cu/Al <sub>2</sub> O <sub>3</sub> catalyst. ....                                                                                                                                   | 14 |
| Figure S10.a. STEM-EDS study of spent Cu/Al <sub>2</sub> O <sub>3</sub> catalyst.....                                                                                                                                 | 15 |
| Figure S10.b. STEM-EDS study of spent Cu/Al <sub>2</sub> O <sub>3</sub> catalyst.....                                                                                                                                 | 15 |
| Figure S11. STEM-EDS study of fresh Cu <sub>25</sub> Ni <sub>75</sub> /Al <sub>2</sub> O <sub>3</sub> catalyst.....                                                                                                   | 16 |
| Figure S12. STEM-EDS study of Cu <sub>25</sub> Ni <sub>75</sub> /Al <sub>2</sub> O <sub>3</sub> after reaction.....                                                                                                   | 17 |
| Figure S13. STEM-EDS study of fresh Cu <sub>50</sub> Ni <sub>50</sub> /Al <sub>2</sub> O <sub>3</sub> catalyst.....                                                                                                   | 18 |
| Figure S14.a. STEM-EDS study of spent Cu <sub>50</sub> Ni <sub>50</sub> /Al <sub>2</sub> O <sub>3</sub> catalyst.....                                                                                                 | 19 |
| Figure S14.b. STEM-EDS study of spent Cu <sub>50</sub> Ni <sub>50</sub> /Al <sub>2</sub> O <sub>3</sub> catalyst. ....                                                                                                | 19 |
| Figure S15. STEM-EDS study of fresh Cu <sub>75</sub> Ni <sub>25</sub> /Al <sub>2</sub> O <sub>3</sub> catalyst.....                                                                                                   | 20 |
| Figure S16.a. STEM-EDS study of spent Cu <sub>75</sub> Ni <sub>25</sub> Al <sub>2</sub> O <sub>3</sub> catalyst.....                                                                                                  | 21 |
| Figure S16.b. STEM-EDS study of spent Cu <sub>75</sub> Ni <sub>25</sub> Al <sub>2</sub> O <sub>3</sub> catalyst. ....                                                                                                 | 21 |
| Figure S17. Particle size distribution of both fresh and spent CuNi/Al <sub>2</sub> O <sub>3</sub> catalyst. ....                                                                                                     | 22 |
| Table S4. Elemental composition of both fresh and spent CuNi/Al <sub>2</sub> O <sub>3</sub> catalysts.....                                                                                                            | 23 |

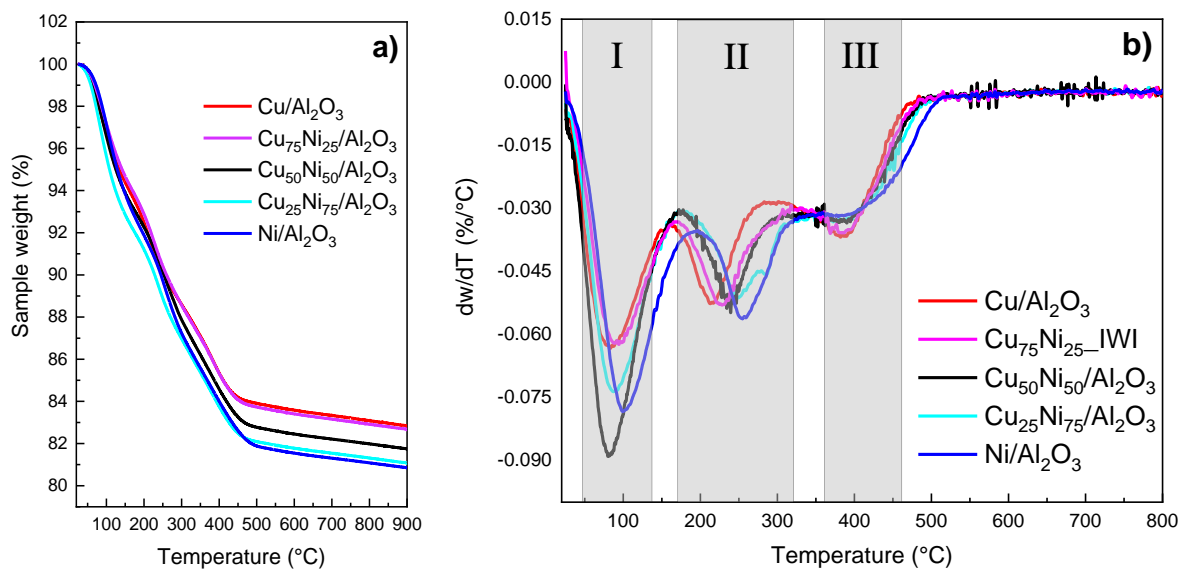

Figure S1. Thermogravimetric analysis of uncalcined samples.

a) TGA; b) DTGA analysis. Conditions: From 20°C up to 900°C, 10K min<sup>-1</sup>, 21% O<sub>2</sub> in Ar, 20 ml min<sup>-1</sup>.

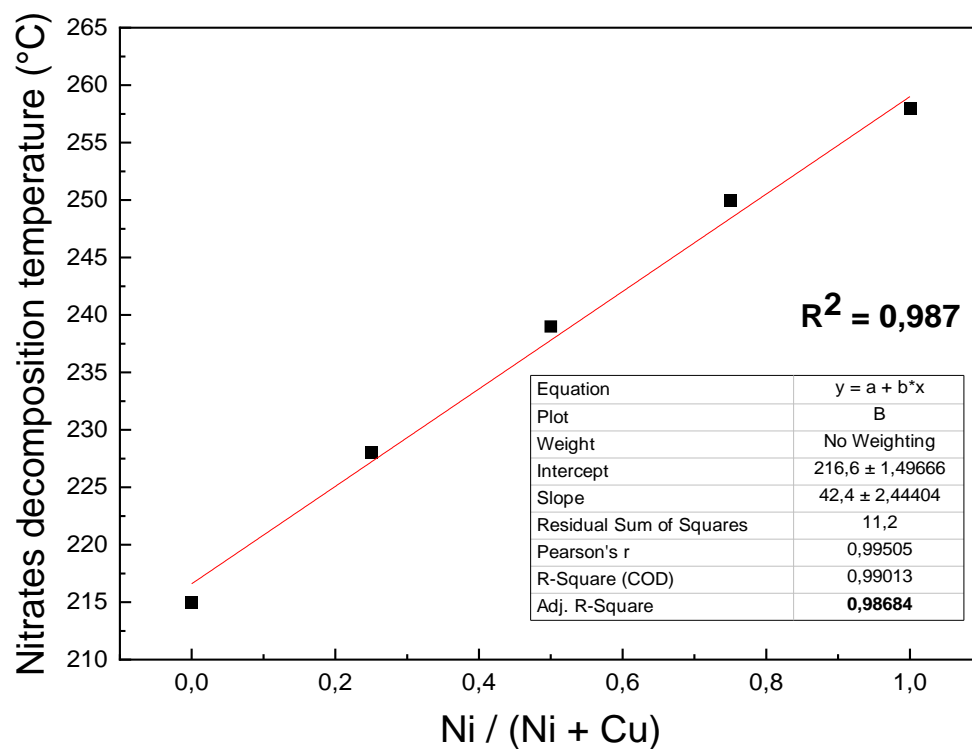

Figure S2. Nitrates decomposition temperature of copper, nickel, and copper-nickel catalyst. Prepared via impregnation of nitrates on  $\gamma$ -alumina. Conditions: 25mg of sample,  $10\text{K min}^{-1}$ , 21%  $\text{O}_2$  in  $\text{N}_2$ ,  $20\text{ ml min}^{-1}$ .

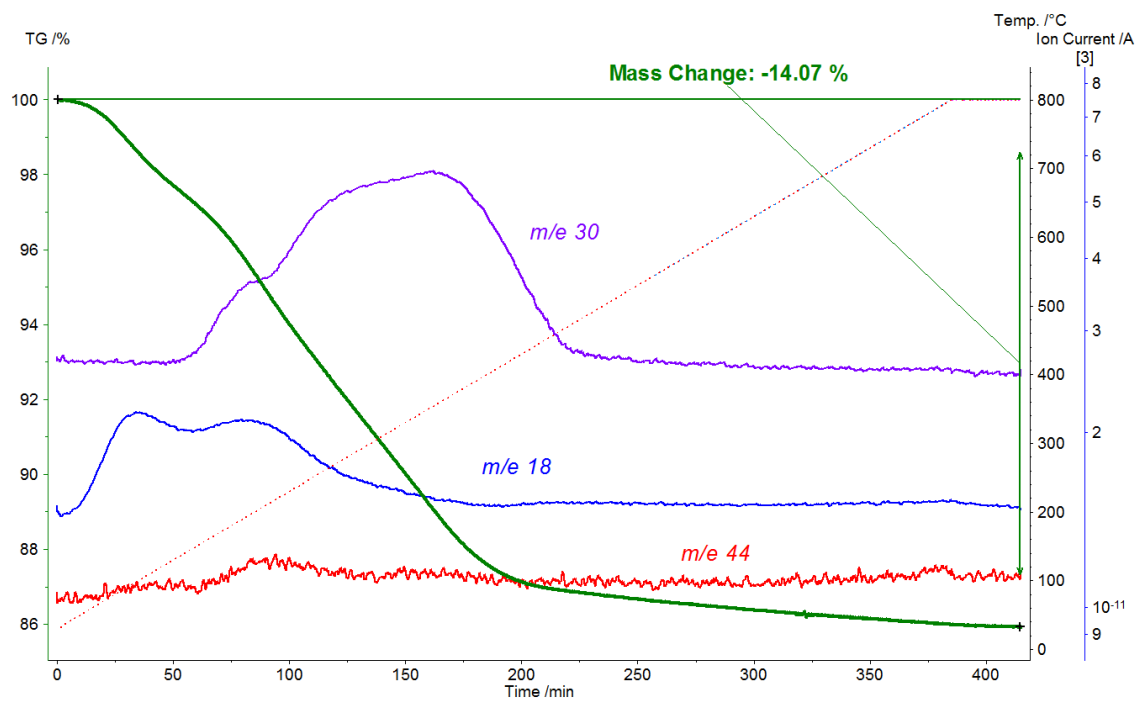

Figure S3. TGA – MS Study of Cu<sub>50</sub>Ni<sub>50</sub>/Al<sub>2</sub>O<sub>3</sub> prepared via impregnation of nitrates.

Conditions: From 20°C to 800°C, 2Kpm, 30min hold, 21% O<sub>2</sub> in Ar, 100 ml min<sup>-1</sup>. m/e = 18 (H<sub>2</sub>O), 30 (NO) and 44 (NO<sub>2</sub>).

| <b>CNHS Analysis (%)</b>                                          |                  |          |          |          |          |
|-------------------------------------------------------------------|------------------|----------|----------|----------|----------|
| <b>Sample</b>                                                     | <b>Treatment</b> | <b>C</b> | <b>N</b> | <b>H</b> | <b>S</b> |
| <b>Al<sub>2</sub>O<sub>3</sub></b>                                | Not Calcined     | 0,06     | n/d      | 0,64     | 0        |
| <b>Cu/Al<sub>2</sub>O<sub>3</sub></b>                             | Impregnated      | 0,03     | 1,53     | 0,96     | 0        |
|                                                                   | Calcined         | 0,12     | n/d      | 0,42     | 0        |
| <b>Cu<sub>75</sub>Ni<sub>25</sub>/Al<sub>2</sub>O<sub>3</sub></b> | Impregnated      | 0.01     | 1.55     | 1.05     | 0        |
|                                                                   | Calcined         | 0.23     | n/d      | 0.69     | 0        |
| <b>Cu<sub>50</sub>Ni<sub>50</sub>/Al<sub>2</sub>O<sub>3</sub></b> | Impregnated      | 0,03     | 1,54     | 0,99     | 0        |
|                                                                   | Calcined         | 0,08     | n/d      | 0,41     | 0        |
| <b>Cu<sub>25</sub>Ni<sub>75</sub>/Al<sub>2</sub>O<sub>3</sub></b> | Impregnated      | 0.01     | 1.61     | 0.96     | 0        |
|                                                                   | Calcined         | 0.20     | n/d      | 0.71     | 0        |
| <b>Ni/Al<sub>2</sub>O<sub>3</sub></b>                             | Impregnated      | 0,02     | 1,51     | 1,03     | 0        |
|                                                                   | Calcined         | 0,07     | n/d      | 0,42     | 0        |

Table S1. Elemental composition of the impregnated and calcined CuNi/Al<sub>2</sub>O<sub>3</sub> catalysts. n/d: below detection limit.

| <b>Sample</b>                                                     | <b>m(cat) / mg</b> | <b>Theoretical H<sub>2</sub> consumption /mmol</b> | <b>Experimental H<sub>2</sub> consumption (T<sub>max</sub>=500°C) /mmol (Relative)</b> | <b>Experimental H<sub>2</sub> consumption (T<sub>max</sub>=900°C) /mmol (Relative)</b> |
|-------------------------------------------------------------------|--------------------|----------------------------------------------------|----------------------------------------------------------------------------------------|----------------------------------------------------------------------------------------|
| <b>Cu/Al<sub>2</sub>O<sub>3</sub></b>                             | 256                | 0.20                                               | 0.19 (95)                                                                              | 0.20 (100%)                                                                            |
| <b>Cu<sub>75</sub>Ni<sub>25</sub>/Al<sub>2</sub>O<sub>3</sub></b> | 255.7              | 0.19                                               | 0.14 (74%)                                                                             | 0.19 (100%)                                                                            |
| <b>Cu<sub>50</sub>Ni<sub>50</sub>/Al<sub>2</sub>O<sub>3</sub></b> | 268.9              | 0.20                                               | 0.12 (60%)                                                                             | 0.20 (100%)                                                                            |
| <b>Cu<sub>25</sub>Ni<sub>75</sub>/Al<sub>2</sub>O<sub>3</sub></b> | 249.5              | 0.18                                               | 0.06 (34%)                                                                             | 0.18 (100%)                                                                            |
| <b>Ni/Al<sub>2</sub>O<sub>3</sub></b>                             | 262.9              | 0.22                                               | 0.03 (13%)                                                                             | 0.20 (91%)                                                                             |
| <b>Al<sub>2</sub>O<sub>3</sub></b>                                | 203.8              | 0                                                  | 0                                                                                      | 0                                                                                      |

Table S2. Hydrogen consumption of the different catalysts after reduction pretreatment at 900°C and 500°C.

The hydrogen consumption was calculated at 500°C (corresponding to the reduction pretreatment prior to catalysis) and 900°C (corresponding to the highest temperature analyzed in the Belcat-II H<sub>2</sub>-TPR setup).

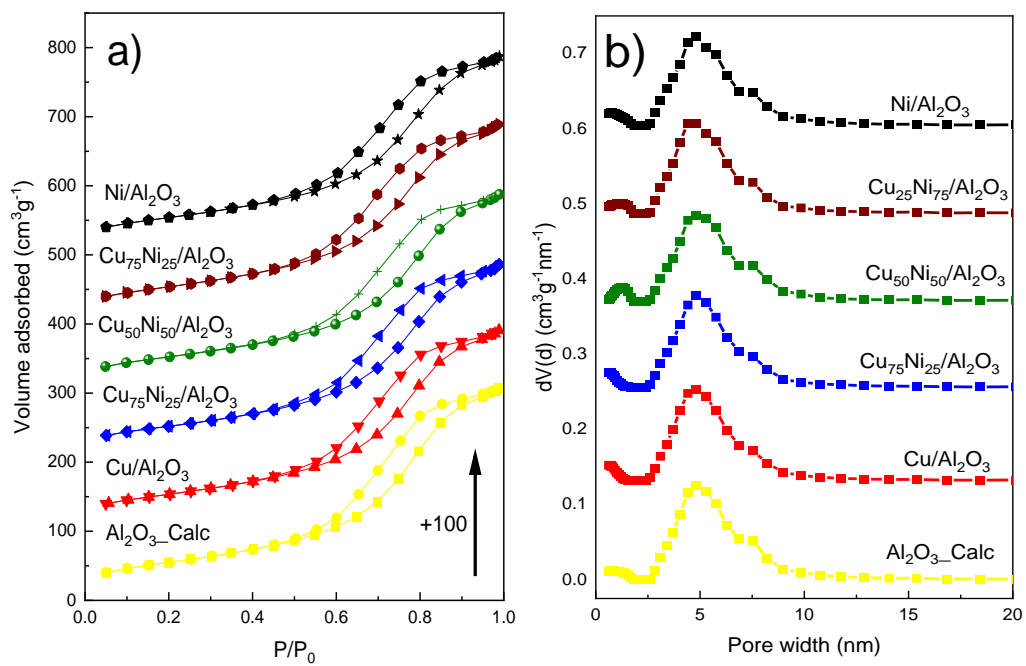

Figure S4. a) Nitrogen sorption isotherms and b) pore size distribution of CuNi/ $\text{Al}_2\text{O}_3$  catalyst.



| <b>Sample</b>                                                     | <b>Name</b> | <b>Position (eV)</b> | <b>% at. XPS</b> | <b>Cu/Ni ratio</b> | <b>% at. ICP</b> | <b>Cu/Ni ratio</b> |
|-------------------------------------------------------------------|-------------|----------------------|------------------|--------------------|------------------|--------------------|
| <b>Cu<sub>25</sub>Ni<sub>75</sub>/Al<sub>2</sub>O<sub>3</sub></b> | Cu 2p       | 932.67               | 21               | 0.27               | 26               | 0.35               |
|                                                                   | Ni 2p       | 856.48               | 79               |                    | 74               |                    |
| <b>Cu<sub>50</sub>Ni<sub>50</sub>/Al<sub>2</sub>O<sub>3</sub></b> | Cu 2p       | 932.49               | 53               | 1.12               | 49               | 0.96               |
|                                                                   | Ni 2p       | 856.59               | 47               |                    | 51               |                    |
| <b>Cu<sub>75</sub>Ni<sub>25</sub>/Al<sub>2</sub>O<sub>3</sub></b> | Cu 2p       | 932,65               | 77               | 3.35               | 75               | 3                  |
|                                                                   | Ni 2p       | 856,63               | 23               |                    | 25               |                    |

Table S3. Comparison of the Cu/Ni atomic ratio determined by XPS and ICP analysis.

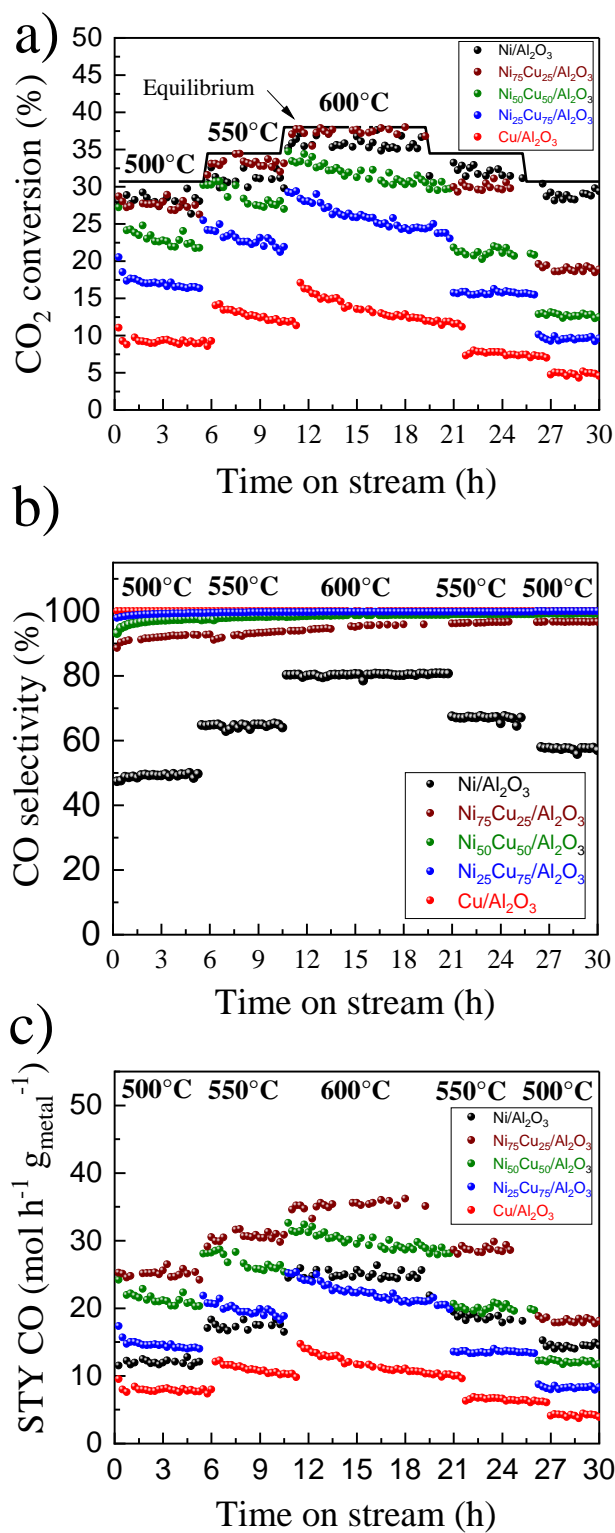

Figure S5. Catalytic performance of the CuNi/Al<sub>2</sub>O<sub>3</sub> catalysts during the 30h of time on stream: a) CO<sub>2</sub> conversion; b) CO selectivity; c) space-time yield of carbon monoxide.

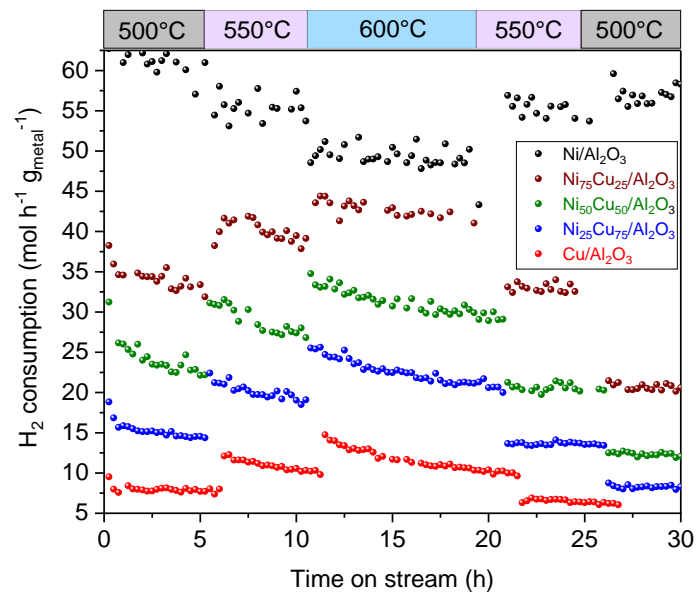

Figure S6. Hydrogen consumption of the different catalysts during time on stream.

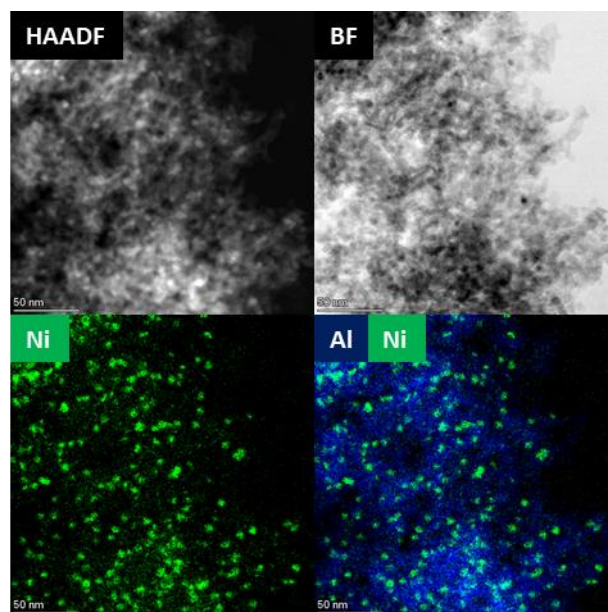

Figure S7. STEM-EDS study of fresh Ni/Al<sub>2</sub>O<sub>3</sub> catalyst.

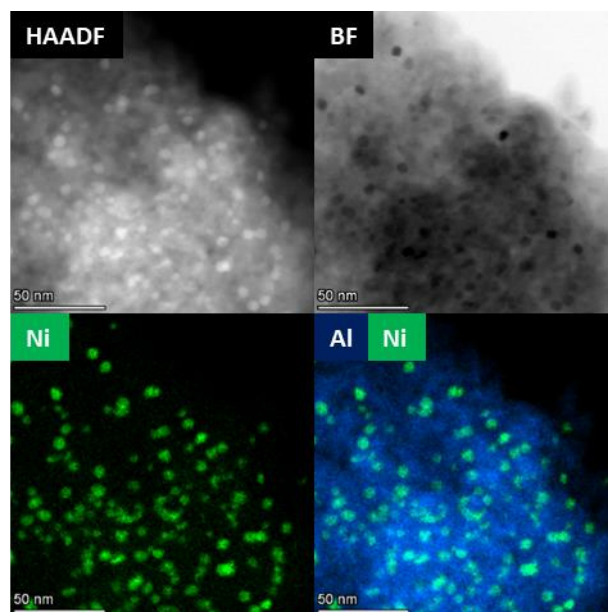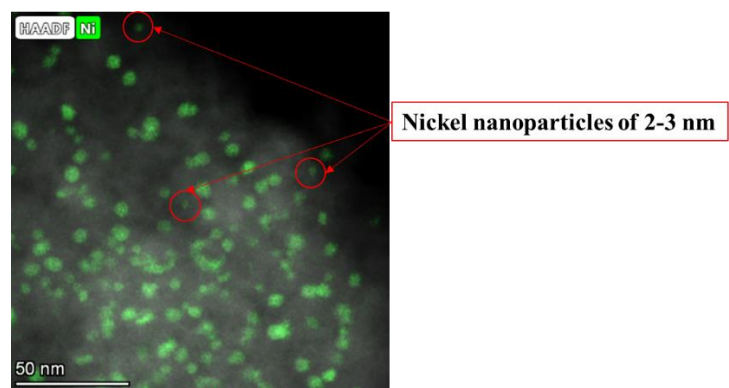

Figure S8. STEM-EDS study of spent Ni/Al<sub>2</sub>O<sub>3</sub> catalyst (after reaction).

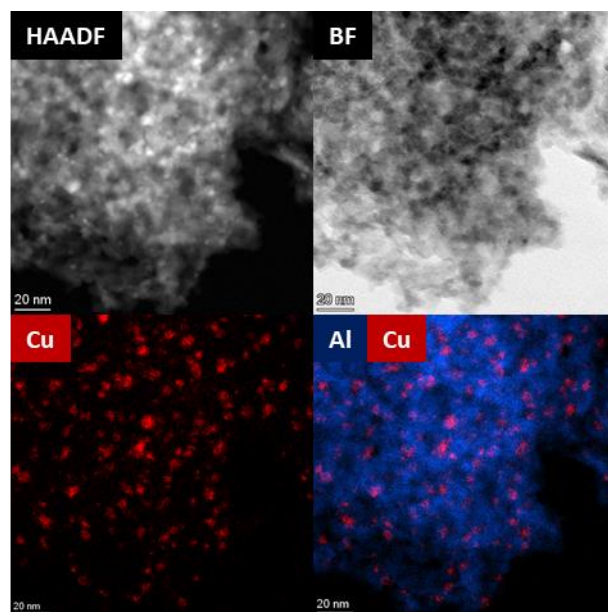

Figure S9. STEM-EDS study of fresh Cu/Al<sub>2</sub>O<sub>3</sub> catalyst.

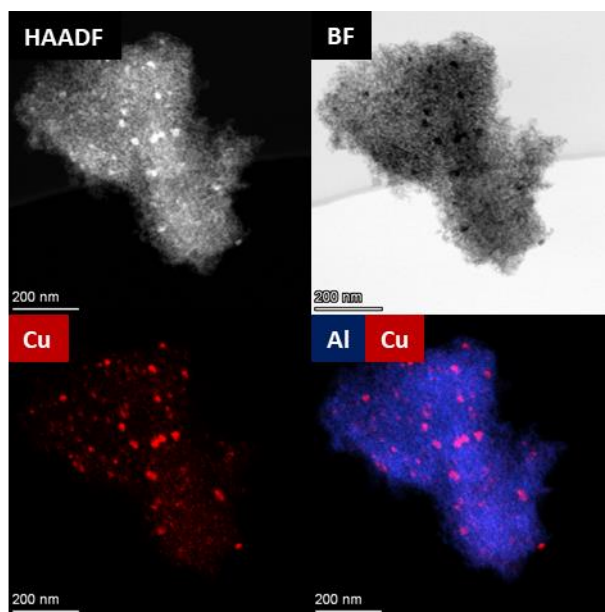

Figure S10.a. STEM-EDS study of spent Cu/Al<sub>2</sub>O<sub>3</sub> catalyst.

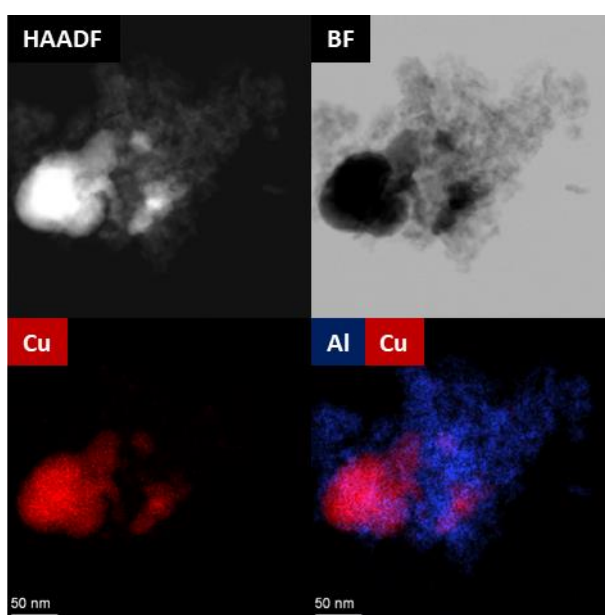

Figure S10.b. STEM-EDS study of spent Cu/Al<sub>2</sub>O<sub>3</sub> catalyst.

Agglomerates up to 100 nm of copper could be observed in the spent Cu/Al<sub>2</sub>O<sub>3</sub> catalyst.

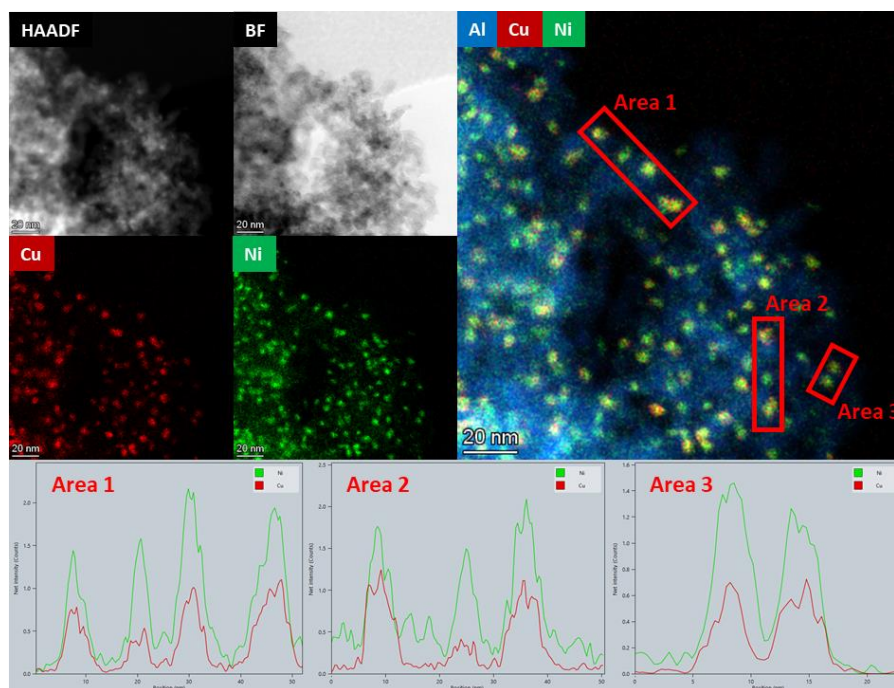

Figure S11. STEM-EDS study of fresh  $\text{Cu}_{25}\text{Ni}_{75}/\text{Al}_2\text{O}_3$  catalyst.



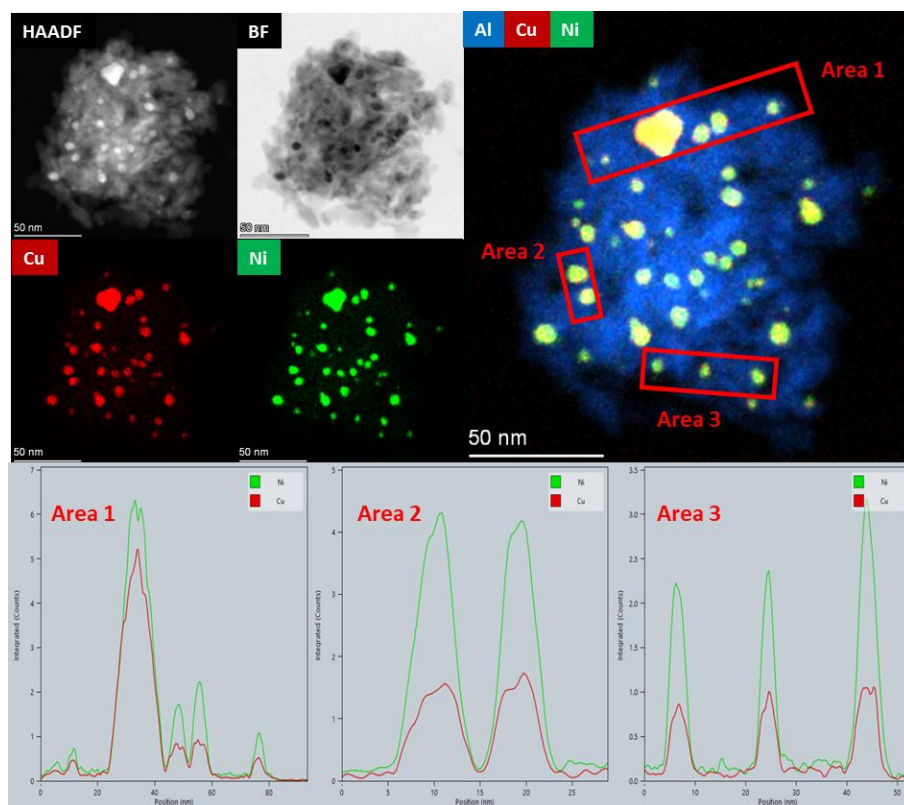

Figure S12. STEM-EDS study of  $\text{Cu}_{25}\text{Ni}_{75}/\text{Al}_2\text{O}_3$  after reaction.

Some isolated agglomerates up to 20 nm could be observed in the spent  $\text{Cu}_{25}\text{Ni}_{75}/\text{Al}_2\text{O}_3$  catalyst.

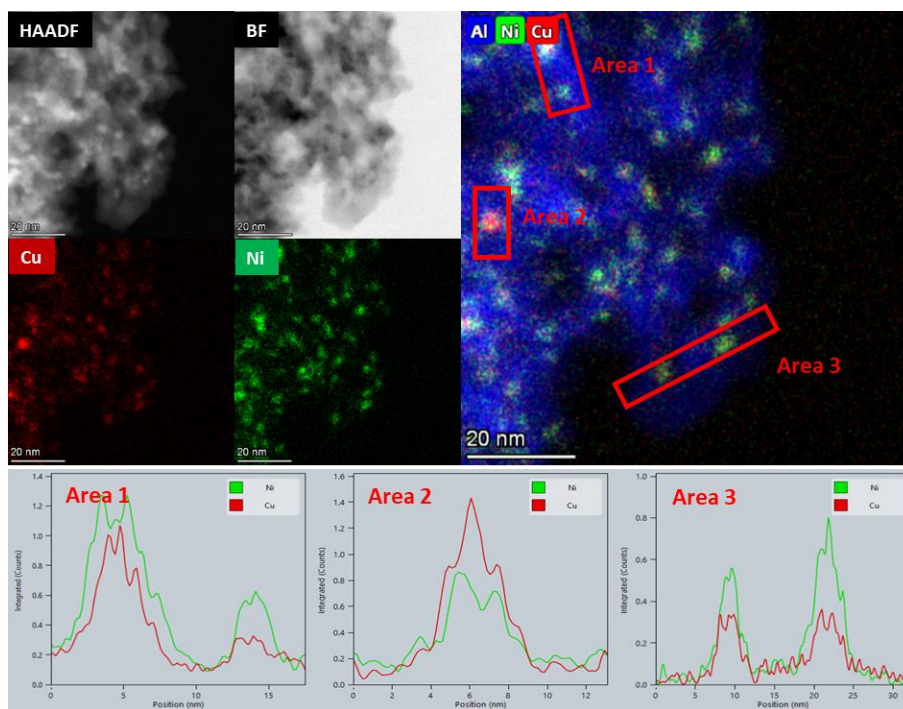

Figure S13. STEM-EDS study of fresh  $\text{Cu}_{50}\text{Ni}_{50}/\text{Al}_2\text{O}_3$  catalyst.

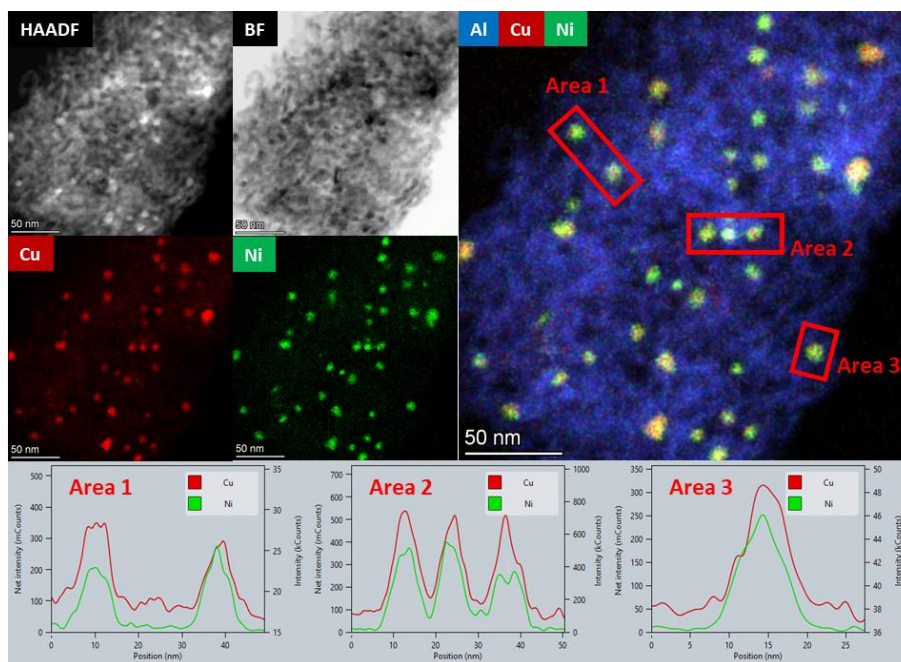

Figure S14.a. STEM-EDS study of spent  $\text{Cu}_{50}\text{Ni}_{50}/\text{Al}_2\text{O}_3$  catalyst.

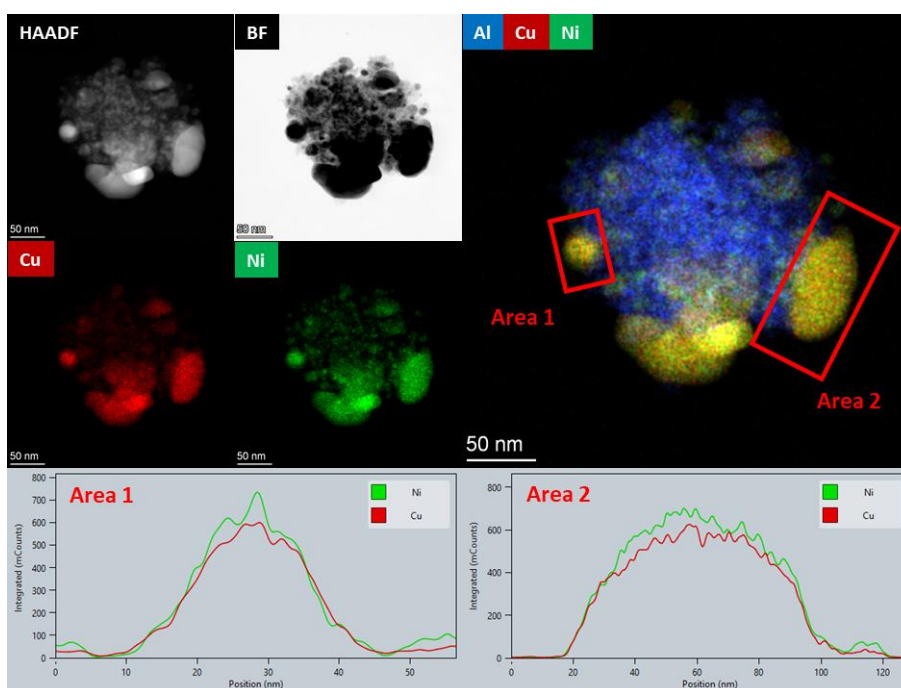

Figure S14.b. STEM-EDS study of spent  $\text{Cu}_{50}\text{Ni}_{50}/\text{Al}_2\text{O}_3$  catalyst.

Agglomerates up to 80 nm of bimetallic  $\text{Cu}_{50}\text{Ni}_{50}$  nanoparticles could be observed in the spent  $\text{Ni}_{50}\text{Cu}_{50}/\text{Al}_2\text{O}_3$  catalyst.

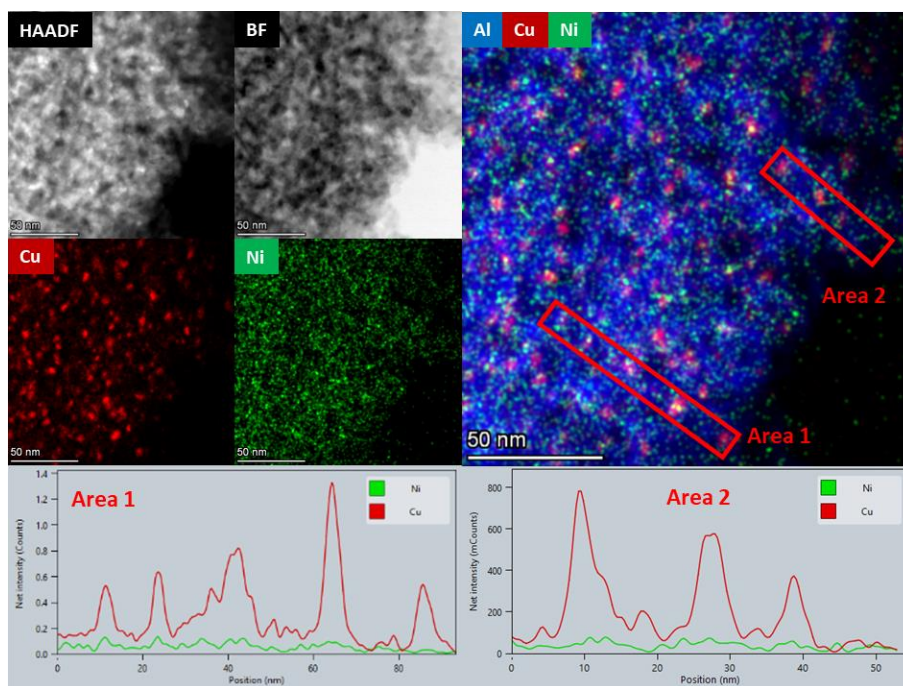

Figure S15. STEM-EDS study of fresh  $\text{Cu}_{75}\text{Ni}_{25}/\text{Al}_2\text{O}_3$  catalyst.



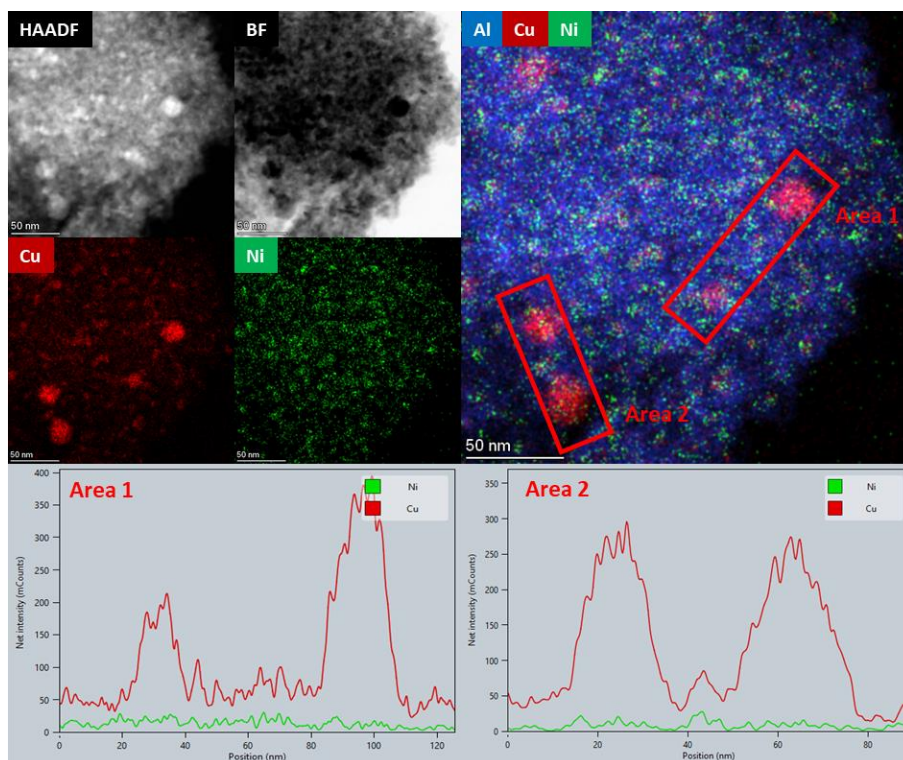

Figure S16.a. STEM-EDS study of spent  $\text{Cu}_{75}\text{Ni}_{25}\text{Al}_2\text{O}_3$  catalyst.

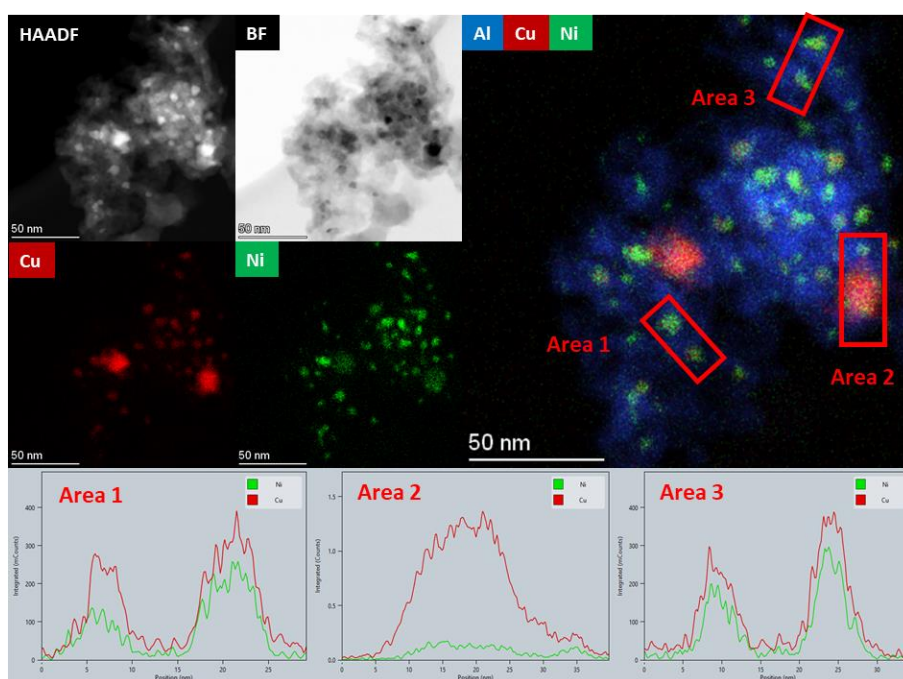

Figure S16.b. STEM-EDS study of spent  $\text{Cu}_{75}\text{Ni}_{25}\text{Al}_2\text{O}_3$  catalyst.

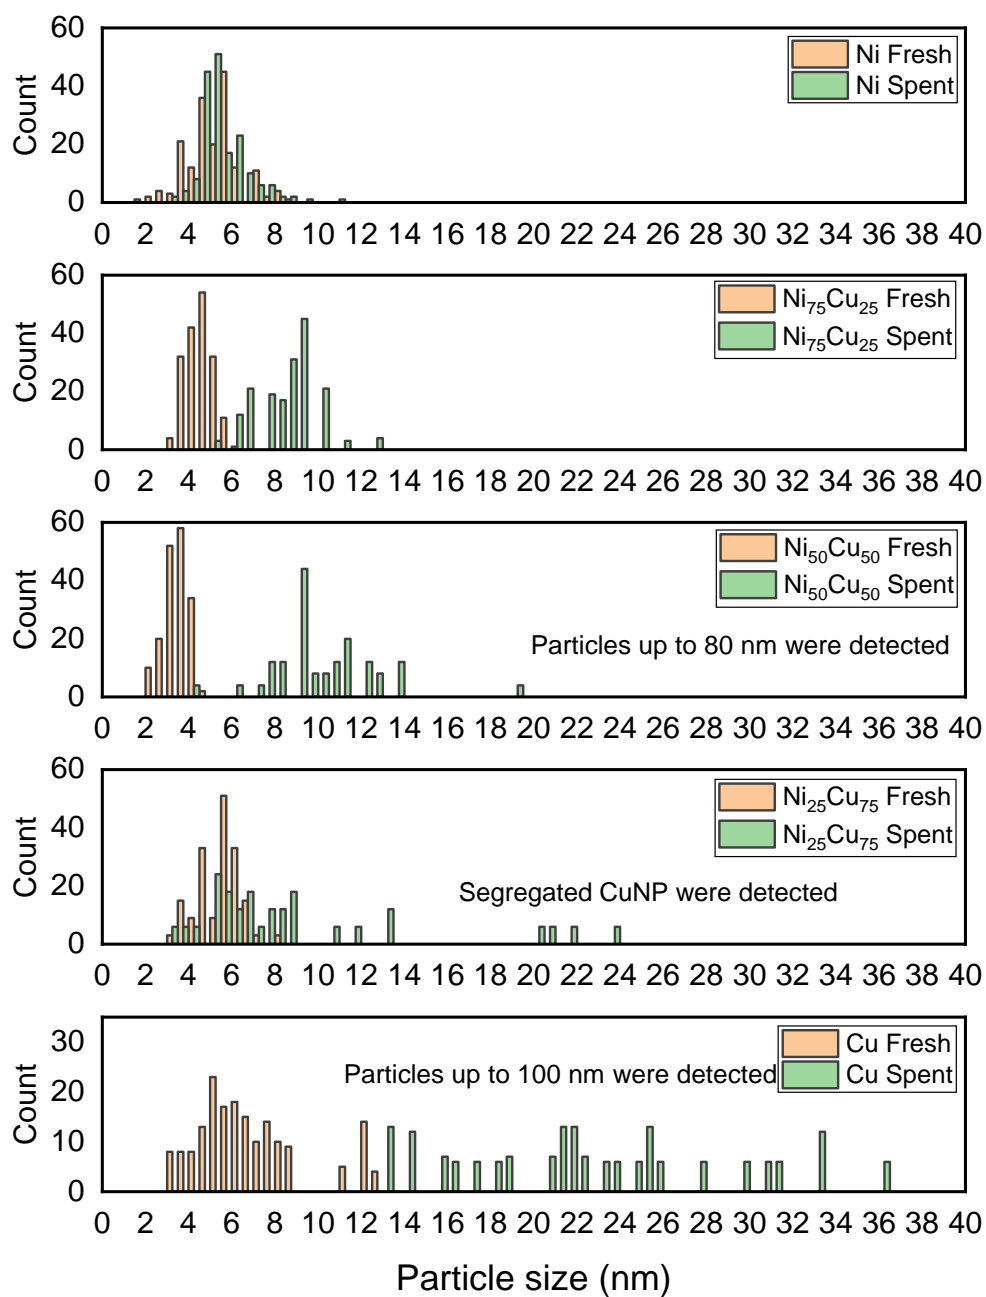

Figure S17. Particle size distribution of both fresh and spent CuNi/Al<sub>2</sub>O<sub>3</sub> catalyst.

| <b>CNHS Analysis (%)</b>                                          |                  |              |          |          |          |
|-------------------------------------------------------------------|------------------|--------------|----------|----------|----------|
| <b>Sample</b>                                                     | <b>Condition</b> | <b>C</b>     | <b>N</b> | <b>H</b> | <b>S</b> |
| <b>Cu/Al<sub>2</sub>O<sub>3</sub></b>                             | Fresh            | <b>0.297</b> | 0.024    | 0.854    | -        |
|                                                                   | Spent            | <b>0.378</b> | 0.029    | 0.829    | -        |
| <b>Cu<sub>75</sub>Ni<sub>25</sub>/Al<sub>2</sub>O<sub>3</sub></b> | Fresh            | <b>0.276</b> | 0.032    | 0.795    | -        |
|                                                                   | Spent            | <b>3.711</b> | 0.117    | 0.965    | -        |
| <b>Cu<sub>50</sub>Ni<sub>50</sub>/Al<sub>2</sub>O<sub>3</sub></b> | Fresh            | <b>0.997</b> | 0.034    | 0.900    | -        |
|                                                                   | Spent            | <b>0.165</b> | 0.138    | 0.938    | -        |
| <b>Cu<sub>25</sub>Ni<sub>75</sub>/Al<sub>2</sub>O<sub>3</sub></b> | Fresh            | <b>0.272</b> | 0.037    | 0.843    | -        |
|                                                                   | Spent            | <b>0.160</b> | 0.036    | 0.974    | -        |
| <b>Ni/Al<sub>2</sub>O<sub>3</sub></b>                             | Fresh            | <b>0.427</b> | 0.017    | 0.917    | -        |
|                                                                   | Spent            | <b>0.201</b> | 0.120    | 0.771    | -        |

Table S4. Elemental composition of both fresh and spent CuNi/Al<sub>2</sub>O<sub>3</sub> catalysts.
